# Supplementary material for: Syntheses, structures and magnetic properties of two heterometallic carbonates: K2Li[Cu(H2O)2Ru2(CO3)4X2]·5H2O (X = Cl, Br)
Source: Royal Society of Chemistry journal article supplement (doi:10.1039/c3ce41029c), 2013-01-01
Supplement: c3ce41029c.pdf [file c3ce41029c.pdf]

## Electronic Supporting Information (ESI)

### Syntheses, Structures and Magnetic Properties of Two Heterometallic Carbonates: $\text{K}_2\text{Li}[\text{Cu}(\text{H}_2\text{O})_2\text{Ru}_2(\text{CO}_3)_4\text{X}_2] \cdot 5\text{H}_2\text{O}$ (X = Cl, Br)

Yan-Yan Jia,<sup>a</sup> Bin Liu,<sup>a,\*</sup> Xue-Mei Liu,<sup>a</sup> and Jian-Hui Yang,<sup>a,\*</sup>

<sup>a</sup>Key Laboratory of Synthetic and Natural Functional Molecule Chemistry of Ministry of Education, College of Chemistry & Materials Science, Shaanxi Key Laboratory of Physico-Inorganic Chemistry, Northwest University, Xi'an 710069, P. R. China

Corresponding Author: [liubin@nwu.edu.cn](mailto:liubin@nwu.edu.cn) (B. Liu). [yjhzj@yahoo.com](mailto:yjhzj@yahoo.com) (J. H. Yang).

Fax: +86-29-88302604.

Table S1. Selected bond angles (°) of complexes **1** and **2**

| 1                  |            |                  |           |
|--------------------|------------|------------------|-----------|
| Ru(1A)–Ru(1)–Cl(1) | 177.35(11) | O(3)–Cu(1)–O(4)  | 92.9(2)   |
| Ru(1A)–Ru(1)–O(1)  | 88.94(17)  | O(4)–Cu(1)–O(3D) | 87.1(2)   |
| Ru(1A)–Ru(1)–O(2A) | 90.48(17)  | O(3)–Cu(1)–O(3E) | 93.0(4)   |
| Cu(2)–O(3)–C(1)    | 128.9(6)   | O(3)–Cu(1)–O(3F) | 87.0(4)   |
| 2                  |            |                  |           |
| Ru(1A)–Ru(1)–Br(1) | 177.37(2)  | O(5)–Cu(1)–O(6)  | 92.10(12) |
| Ru(1A)–Ru(1)–O(1A) | 89.07(8)   | O(5)–Cu(1)–O(7)  | 86.04(13) |
| Ru(1A)–Ru(1)–O(2)  | 90.36(8)   | O5–Cu(1)–O6D     | 87.90(12) |
| Ru(1A)–Ru(1)–O(3A) | 90.42(8)   | O5–Cu(1)–O7D     | 93.96(13) |
| Ru(1A)–Ru(1)–O(4)  | 88.83(8)   | O6–Cu1–O7D       | 89.52(12) |
| Cu(1)–O(5)–C(1)    | 130.3(3)   | O6D–Cu1–O7D      | 90.48(12) |
| Cu(1)–O(6)–C(2A)   | 128.0(3)   |                  |           |

Symmetry codes: **1**: A: -x + 1, -y + 1, -z + 2; B: y, x, z; C: -y + 1, -x + 1, -z + 2; D: -x + 1, -y + 2, -z + 2; E: -y + 3/2, -x + 3/2, z; F: y - 1/2, x + 1/2, -z + 2. **2**: A, 1/2 - x, 1/2 - y, z; D: -x, 1 - y, 1 - z.

\* Corresponding author. Tel./fax: +86-029-88302604.

E-mail address: [liubin@nwu.edu.cn](mailto:liubin@nwu.edu.cn) (B. Liu)

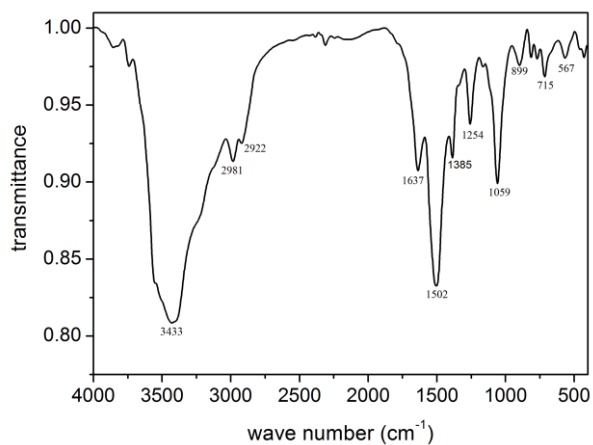

**Fig S1.** IR spectra of complex 1.

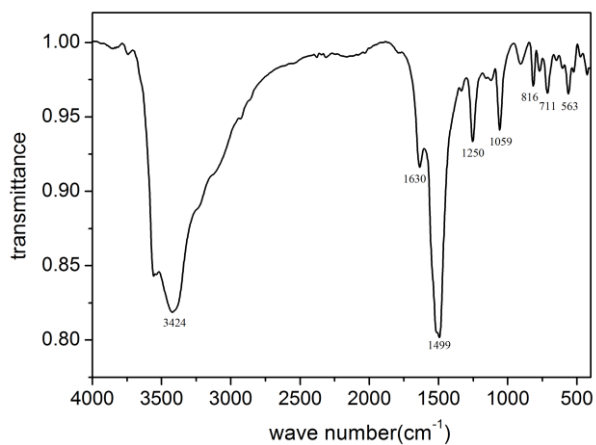

**Fig S2.** IR spectra of complex 2.

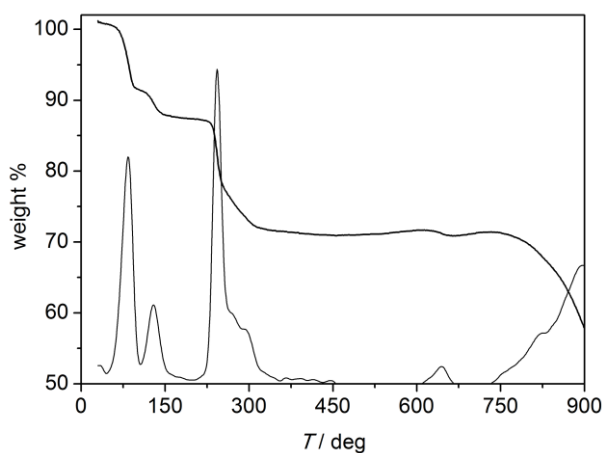

**Fig S3.** Thermal analysis of complex 1.

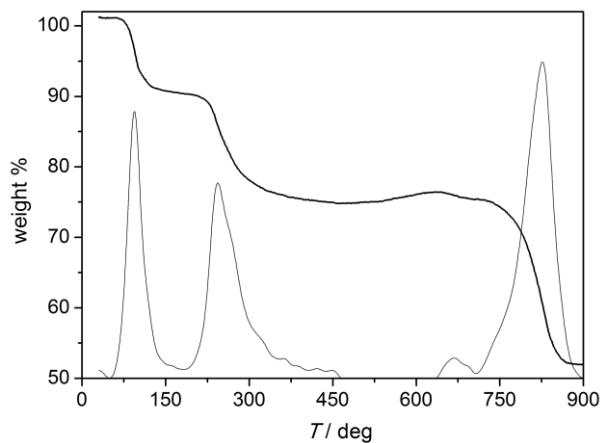

**Fig S4.** Thermal analysis of complex 2.

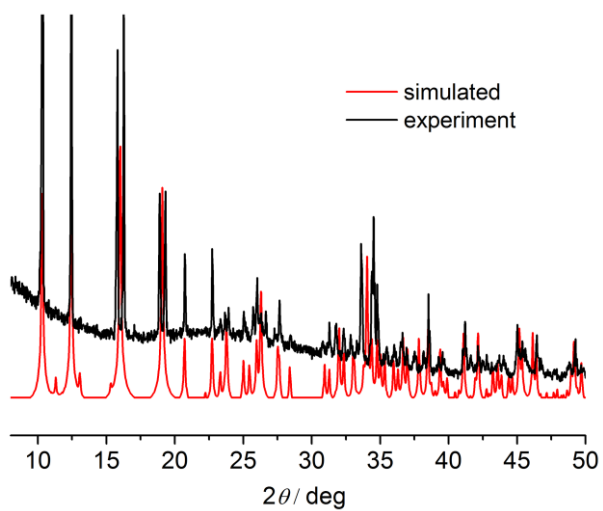

**Fig. S5** Comparison of XRPD patterns of the simulated and as-synthesized of 1.

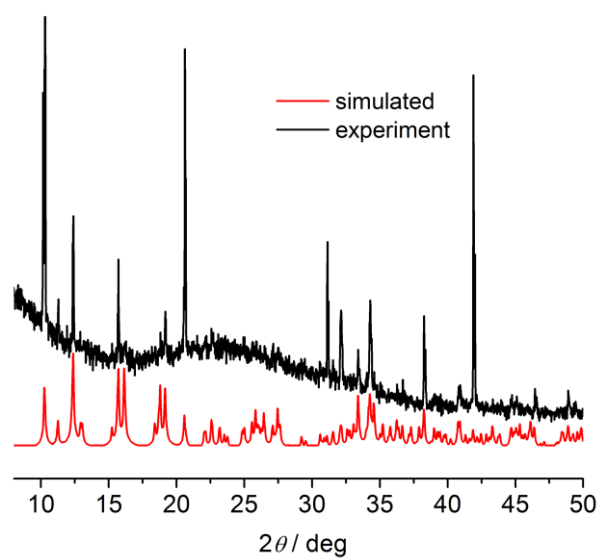

**Fig. S6** Comparison of XRPD patterns of the simulated and as-synthesized of 2.



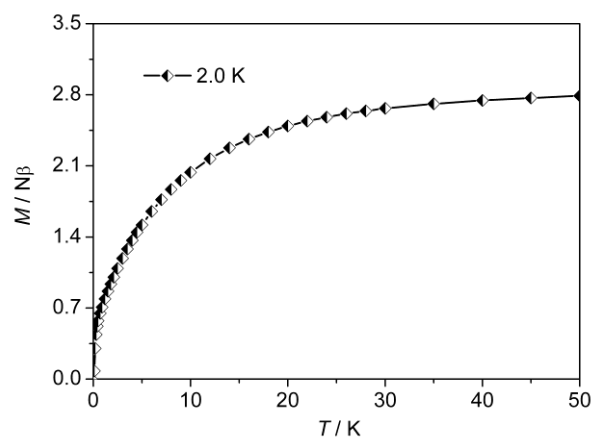

**Fig. S10**  $M$  vs  $H$  plot for complex 2

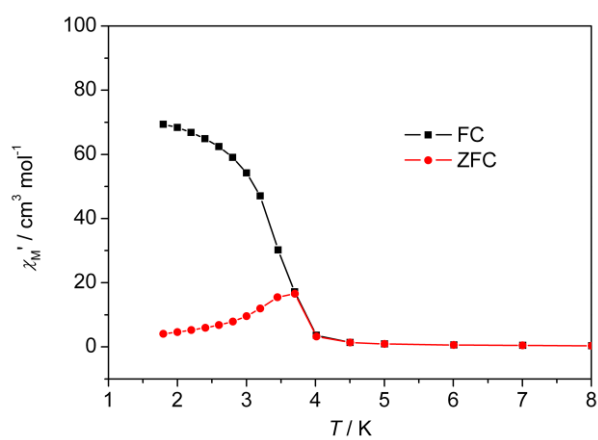

**Fig. S11** FC and ZFC vs  $T$  plots for 2
